# Supplementary material
Source: publisher site journal article supplement (https://www.dovepress.com/article/346591)
Supplement: Supplementary file 1 [file get_supplementary_file.php]

**Frequency and severity of exacerbations of COPD associated with future risk of exacerbations and mortality**

Supplementary material

Contents

[Number of moderate events in patients with severe baseline exacerbations 2](#_Toc90391197)

[Table E1: Baseline study variables and covariates 3](#_Toc90391198)

[Table E2. Incidence rates of any (moderate or severe) exacerbation during follow-up and incidence rate ratio (IRR) comparing patients (N=340,515) categorized by baseline frequency and severity of exacerbation 5](#_Toc90391199)

[Table E3. Incidence rates of moderate exacerbation during follow-up and incidence rate ratio (IRR) comparing patients (N=340,515) categorized by baseline frequency and severity of exacerbation 6](#_Toc90391200)

[Table E4. Incidence rates of severe exacerbation during follow-up and incidence rate ratio (IRR) comparing patients (N=340,515) categorized by baseline frequency and severity of exacerbation 7](#_Toc90391201)

[Table E5. Incidence rates of all-cause mortality, COPD related mortality and cardiovascular related mortality during follow-up and incidence rate ratio (IRR) comparing patients categorized by baseline frequency and severity of exacerbation. 8](#_Toc90391202)

[Table E6. Incidence rates of future moderate and/or exacerbation during follow-up and incidence rate ratio (IRR) comparing patients categorized by baseline frequency and severity of exacerbation in patients with anxiety disorder, depression, or GORD and for patients with current asthma. 9](#_Toc90391203)

[Table E7. Incidence rates of future moderate and/or severe exacerbation during follow-up and incidence rate ratio (IRR) comparing patients categorized by baseline frequency and severity of exacerbation in patients with EOS≥300 and in patients with cardiovascular disease. 10](#_Toc90391204)

[Figure E1. Flow diagram of COPD patients included in the study population. 11](#_Toc90391205)

[Figure E2. Exacerbation frequency and severity in patients with active follow-up for each calendar year of follow-up. 12](#_Toc90391206)

# Number of moderate events in patients with severe baseline exacerbations

The mean number of moderate events in patients with 1 severe baseline exacerbation was 2.8 (SD 2.5). The mean number of moderate events in patients with 2 severe baseline exacerbations was 3.2 (SD 2.7). The mean number of moderate events in patients with 3+ severe baseline exacerbations was 3.5 (SD 2.7).

# Table E1: Baseline study variables and covariates

| **Variable** | **Parameterization** |
| --- | --- |
| Age at Index date | Continuous variable, or as categorical |
| Gender | Male, Female |
| Body Mass Index (BMI) in last five years of patient history (measurement closest to index date was selected) | Weight in kilograms divided by height in meters squared, will be utilized as either a continuous variable or a categorical variable using the following categories widely referenced as WHO classification: Underweight (Below 18.5), Normal (18.5 - 24.9), Overweight (25.0 - 29.9), and Obese (30.0 and greater). |
| Smoking status, most recent in patient history | Two categories to be created: ex-smoker and current smoker |
| Comorbidities, ever in patient history | Patients will be classified (separately for each comorbidity) as having a history of the following comorbidities anytime in CPRD history preceding the index date:   - Depression - Anxiety disorder - GORD - Lung cancer - Acute myocardial infarction - Congestive heart failure - Stroke |
| Current asthma diagnosis | A diagnosis of asthma (=1) vs. no history of asthma (=0) in a period of 3 years before a 2-year period prior to COPD diagnosis. This is because asthma diagnoses made 2 years prior to a COPD diagnosis is likely to be misclassified COPD. Any asthma diagnosis made 3 years prior to this is therefore likely to be a current asthma diagnosis. |
| Overall Social Deprivation Scores for England (Index of Multiple Deprivation (IMD)) | The IMD deprivation score is derived for 32,482 areas in the UK, ranging from 1 (most deprived) to 32,482 (least deprived). CPRD links this deprivation score and can supply the scores that split the areas into 5 groups (i.e. quintiles) of decreasing deprivation. Briefly, IMD data includes deprivation indices at the practice level, which is a weighted deprivation score based on factors such as income, employment, education, health deprivation, crime, housing and living environment. Deprivation scores are calculated for each small area in England and are ranked from the most deprived areas (decile 1) to the least deprived area (decile 10). |
| Medical Research Council (MRC) dyspnea scale measurement within the 24 months prior to and up to 3 months following index date | - Grade 1: No Dyspnea except on strenuous Exercise - Grade 2: Short of breath when walking up a short hill - Grade 3: Dyspnea limits walking pace (slower than others) and stops to catch breath - Grade 4: Stops to catch breath after walking 100 meters (328 feet) on level ground - Grade 5: Dyspnea prevents leaving house and performing Activities of Daily Living - Unknown / Unavailable if no record available within the 24-month prior to and up to 3 months following index date |
| COPD GOLD grade of airflow limitation measurement closest to index date within the window of 24 months prior and up to 3 months following the index date | Defined according to GOLD-defined lung obstruction based classification   - GOLD 1: FEV1% predicted ≥80% - GOLD 2: FEV1 % predicted ≥50 -<80% - GOLD 3: FEV1% predicted ≥30 -<50% - GOLD 4: FEV1 % predicted <30% - Unknown (if missing spirometry during the 24-month prior to and up to 3 months following index date) |
| Respiratory maintenance treatment medication exposure in 12 months prior to index date (inclusive of index date) | Exposure to specific respiratory therapies over the 12 months prior to the index date; ≥1 Rx was flagged versus those with Rx ‘0’. The following respiratory therapies will be included:   - Roflumilast - Theophylline - ICS only - LABA only - LAMA only - LABA/LAMA fixed and open combinations - ICS/LABA fixed and open combinations - ICS/LABA+LAMA (triple) fixed and open combinations - SABA only - SAMA only - SAMA/SABA fixed and open combinations - No maintenance treatment (nb: it is possible patients have other medications not listed above such as OCS) |
| LRTI history in 12 months prior to index date for incident COPD patients | Frequency and mean (SD) number of LRTI/AECOPD |
| Number of GP practice consultations in 12 months prior to index date | Count variable. One encounter per contact type was allowed per day to avoid multiple counting of the same events. |
| Number of A&E visits in 12 months prior to index date | Count variable. One encounter per contact type was allowed per day to avoid multiple counting of the same events. |
| Number of hospitalizations in 12 months prior to index date | Count variable. One encounter per contact type was allowed per day to avoid multiple counting of the same events. |
| Peripheral blood eosinophil level (nearest prior and within 12M to index date) | Geometric mean and 95% CI, range, median, interquartile range. The following thresholds included: 100 cells/ul, and 300 cells/ul. |

# Table E2. Incidence rates of any (moderate or severe) exacerbation during follow-up and incidence rate ratio (IRR) comparing patients (N=340,515) categorized by baseline frequency and severity of exacerbation

| Baseline exacerbation | Total number of events  n=1,963,268 | Incidence rate per 100 person-years(95% CI) | Crude IRR (95% CI)  N=340,515 | Adjusted IRR* (95% CI)  N=86,306 |
| --- | --- | --- | --- | --- |
| None  n=181,176 | 581,360 (29.6) | 76.6 (76.4 – 76.8) | 1 (ref) | 1 (ref) |
| 1 moderate only n=68,038 | 413,831 (21.1) | 132.0 (131.6 – 132.4) | 1.72 (1.70 – 1.74) | 1.70 (1.66 – 1.74) |
| 2 moderate only  n=31,825 | 284,961 (14.5) | 182.2(181.5 – 182.9) | 2.38 (2.25 – 2.41) | 2.31 (2.24 – 2.37) |
| ≥3 moderate only n=33,780 | 495,327 (25.2) | 285.9 (185.1 – 286.7) | 3.73 (3.69 – 3.78) | 3.52 (3.43 – 3.62) |
| 1 severe n=19,194 | 137,557 (7.0) | 230.2 (229.0 – 231.4) | 3.01 (2.95 – 3.06) | 2.53 (2.44 – 2.63) |
| 2 severe n=4,094 | 30,128 (1.5) | 300.6 (297.2 – 304.0) | 3.93 (3.80 – 4.06) | 3.00 (2.79 – 3.22) |
| 3 or more severe  n=2,408 | 20,104 (1.0) | 415.8 (410.1 – 421.6) | 5.43 (5.23 – 5.63) | 4.08 (3.75 – 4.43) |

* Adjusted for all baseline characteristics Table 1.

# Table E3. Incidence rates of moderate exacerbation during follow-up and incidence rate ratio (IRR) comparing patients (N=340,515) categorized by baseline frequency and severity of exacerbation

| Baseline exacerbationcategory | N events n=1,681,909 | Rate 100py(95% CI) | Crude IRR (95% CI)  N=340,515 | Adjusted IRR* (95% CI)  N=86,306 |
| --- | --- | --- | --- | --- |
| None n=181,176 | 485,552 (28.9) | 64.0 (63.8 – 64.1) | 1 (ref) | 1 (ref) |
| 1 moderate only n=68,038 | 460,265 (21.4) | 114.9 (114.5 – 115.3) | 1.80 (1.77 – 1.82) | 1.80 (1.76 – 1.85) |
| 2 moderate only  n=31,825 | 252,474 (15.0) | 161.4 (160.8 -162.1) | 2.52 (2.49 – 2.55) | 2.52 (2.44 – 2.59) |
| ≥3 moderate only n=33,780 | 447,400 (26.0) | 258.3 (257.5 – 259.0) | 4.04 (3.99 – 4.09) | 3.96 (3.85 – 4.08) |
| 1 severe n=19,194 | 104,665 (6.2) | 175.1 (174.1 – 176.2) | 2.74 (2.68 – 2.80) | 2.42 (2.31 – 2.53) |
| 2 severe n=4,094 | 20,486 (1.2) | 204.4 (201.6 – 207.2) | 3.20 (3.07 – 3.33) | 2.49 (2.28 – 2.72) |
| 3 or more severe  n=2,408 | 11,067 (0.7) | 228.9 (224.7 – 233.2) | 3.58 (3.40 – 3.77) | 2.90 (2.58 – 3.26) |

* Adjusted for all baseline characteristics listed in Table 1.

# Table E4. Incidence rates of severe exacerbation during follow-up and incidence rate ratio (IRR) comparing patients (N=340,515) categorized by baseline frequency and severity of exacerbation

| Baseline exacerbation category | N events during follow-up n=281,359 | Rate 100py(95% CI) | Crude IRR (95% CI)  N=340,515 | Adjusted IRR* (95% CI)  N=86,306 |
| --- | --- | --- | --- | --- |
| None n=181,176 | 95,808 (34.1) | 12.6 (12.5 – 12.7) | 1 (ref) | 1 (ref) |
| 1 moderate only n=68,038 | 53,566 (19.0) | 17.1 (16.9 – 17.2) | 1.35 (1.33 – 1.38) | 1.27 (1.21 – 1.32) |
| 2 moderate only  n=31,825 | 32,487 (11.6) | 20.8 (20.5 – 21.0) | 1.64 (1.61 – 1.69) | 1.45 (1.38 – 1.53) |
| ≥3 moderate only n=33,780 | 47,927 (17.0) | 27.7 (27.4 – 27.9) | 2.19 (2.14 – 2.24) | 1.80 (1.71 – 1.89) |
| 1 severe n=19,194 | 32,892 (11.7) | 55.0 (54.5 – 55.6) | 4.36 (4.25 – 4.48) | 2.70 (2.57 – 2.85) |
| 2 severe n=4,094 | 9,642 (3.4) | 96.2 (94.3 – 98.1) | 7.62 (7.28 – 7.98) | 4.10 (3.71- 4.52) |
| 3 or more severe  n=2,408 | 9,037 (3.2) | 186. (183.1-190.8) | 14.81 (14.06 – 15.60) | 6.35 (5.63 – 7.17) |

* Adjusted for all baseline characteristics listed in Table 1.

# Table E5. Incidence rates of all-cause mortality, COPD related mortality and cardiovascular related mortality during follow-up and incidence rate ratio (IRR) comparing patients categorized by baseline frequency and severity of exacerbation.

|  | All-cause mortality | | COPD related mortality | | Cardiovascular related mortality | |
| --- | --- | --- | --- | --- | --- | --- |
| Baseline exacerbation category | **N of deaths**  **n=109,209** | **Adjusted IRR* (95% CI) N=86,306** | **N of deaths**  **n=22,437** | **Adjusted IRR* (95% CI) N=86,306** | **N of deaths**  **n=8,169** | **Adjusted IRR* (95% CI) N=86,306** |
| No exacerbation | 47,340 (43.4) | 1 (ref) | 7,859 | 1 (ref) | 3,692 (45.0) | 1 (ref) |
| 1 moderate only | 22,121 (20.3) | 1.08 (1.04- 1.12) | 4,092 | 1.17 (1.04 – 1.33) | 1,743 (21.3) | 1.23 (1.07 – 1.42) |
| 2 moderate only | 11,892 (10.9) | 1.16 (1.10 – 1.22) | 2,398 | 1.26 (1.08 – 1.46) | 894 (10.9) | 1.34 (1.12 – 1.60) |
| ≥3 moderate only | 14,475 (13.3) | 1.32 (1.26 – 1.39) | 3,586 | 1.65 (1.46 – 1.88) | 994 (12.2) | 1.44 (1.21 – 1.71) |
| 1 severe | 9,496 (8.7) | 1.75 (1.66 – 1.85) | 2,921 | 2.38 (2.08 – 2.73) | 619 (7.6) | 1.65 (1.34 – 2.02) |
| 2 severe | 2,353 (2.2) | 2.33 (2.10 – 2.58) | 842 | 2.88 (2.28 – 3.63) | 153 (1.9) | 1.92 (1.27 – 2.88) |
| ≥3 more severe | 1,532 (1.4) | 2.87 (2.53 – 3.25) | 739 | 5.23 (4.21 – 6.49) | 74 (0.7) | 1.34 (0.66 – 2.72) |

* Adjusted for all baseline characteristics listed in Table 1.

# Table E6. Incidence rates of future moderate and/or exacerbation during follow-up and incidence rate ratio (IRR) comparing patients categorized by baseline frequency and severity of exacerbation in patients with anxiety disorder, depression, or GORD and for patients with current asthma.

|  | Patients with anxiety, depression or GORD | | | Patients with asthma | | |
| --- | --- | --- | --- | --- | --- | --- |
| Baseline exacerbation category | **Adjusted* IRR (95% CI) for repeated AECOPD N=42,153** | **Adjusted* IRR (95% CI) for repeated moderate AECOPD**  **N=42,153** | **Adjusted* IRR (95% CI) for repeated severe AECOPD N=42,153** | **Adjusted* IRR (95% CI) for repeated AECOPD**  **N=16,739** | **Adjusted* IRR (95% CI) for repeated moderate AECOPD N=16,739** | **Adjusted* IRR (95% CI) for repeated severe AECOPD N=16,739** |
| No exacerbation | 1 (ref) | 1 (ref) | 1 (ref) | 1 (ref) | 1 (ref) | 1 (ref) |
| 1 moderate only | 1.71 (1.65 – 1.77) | 1.78 (1.71 – 1.85) | 1.36 (1.27 – 1.45) | 1.74 (1.65- 1.84) | 1.83 (1.73 – 1.94) | 1.28 (1.15 – 1.41) |
| 2 moderate only | 2.32 (2.23 – 2.41) | 2.51 (2.40 – 2.62) | 1.44 (1.34 – 1.56) | 2.36 (2.23 – 2.50) | 2.53 (1.38- 2.69) | 1.47 (1.31 – 1.64) |
| ≥3 moderate only | 3.55 (3.42 – 3.68) | 3.92 (3.77 – 4.07) | 1.83 (1.70 – 1.96) | 3.60 (2.41 – 3.78) | 3.91 (3.70 – 4.13) | 2.01 (1.82- 2.23) |
| 1 severe | 2.65 (2.51 – 2.80) | 2.54 (2.39 – 2.71) | 2.98 (2.75 – 3.22) | 3.79 (2.57- 3.03) | 2.90 (2.44 – 3.44) | 3.11 (2.74 – 3.54) |
| 2 severe | 3.30 (2.99 – 3.64) | 2.81 (2.50 – 3.16) | 4.79 (4.18 – 5.50) | 3.27 (2.83 – 3.77) | 2.90 (2.44 – 3.44) | 4.93 (4.02 – 6.05) |
| 3 or more severe | 4.50 (4.07 – 4.98) | 3.56 (3.11 – 4.06) | 7.18 (6.14 – 8.40) | 4.04 (3.41 – 4.79) | 3.22 (2.59 – 4.00) | 6.89 (5.24 – 9.06) |

* Adjusted for all baseline characteristics listed Table 1.

# Table E7. Incidence rates of future moderate and/or severe exacerbation during follow-up and incidence rate ratio (IRR) comparing patients categorized by baseline frequency and severity of exacerbation in patients with EOS≥300 and in patients with cardiovascular disease.

|  | Patients with blood eosinophils ≥300cells/µl | | | Patients with cardiovascular disease | | |
| --- | --- | --- | --- | --- | --- | --- |
| Baseline exacerbationcategory | **Adjusted* IRR (95% CI) for all** exacerbation  **N=27,280** | **Adjusted* IRR (95% CI) for moderate** exacerbation **N=27,280** | **Adjusted* IRR (95% CI) for severe** exacerbation **N=27,280** | **Adjusted* IRR (95% CI) for all** exacerbation **N=31,687** | **Adjusted* IRR (95% CI) for moderate** exacerbation **N=31,687** | **Adjusted* IRR (95% CI) for severe** exacerbation **N=31,687** |
| No exacerbation | 1 (ref) | 1(ref) | 1 (ref) | 1 (ref) | 1 (ref) | 1 (ref) |
| 1 moderate only | 1.67 (1.60 – 1.74) | 1.78 (1.70 – 1.86) | 1.21 (1.12 – 1.31) | 1.68 (1.61 – 1.75) | 1.78 (1.70 – 1.86) | 1.28 (1.20-1.37) |
| 2 moderate only | 2.23 (2.12 – 2.34) | 2.44 (2.32 – 2.58) | 1.38 (1.25 – 1.53) | 2.25 (2.14 – 2.36) | 2.47 (2.34 – 2.61) | 1.42 (1.31 – 1.54) |
| ≥3 moderate only | 3.48 (3.33 – 3.64) | 3.94 (3.75 – 4.14) | 1.70 (1.56 -1.84) | 3.49 (3.34 – 3.64) | 3.97 (3.79 – 4.16) | 1.75 (1.62 – 1.89) |
| 1 severe | 2.57 (2.40 – 2.74) | 2.48 (2.29 – 2.68) | 2.66 (2.43 – 2.92) | 2.45 (2.33 – 2.63) | 2.44 (2.27 – 2.62) | 2.56 (2.37 – 2.77) |
| 2 severe | 2.79 (2.49 – 3.12) | 2.27 (1.96 – 2.62) | 3.86 (3.25 – 4.58) | 2.90 (2.63 – 3.20) | 2.63 (2.33 – 2.97) | 3.60 (3.11 – 4.16) |
| ≥3 severe | 3.22 (2.74 – 3.78) | 2.15 (1.71 – 2.69) | 5.35 (4.33 – 6.61) | 3.86 (3.40 – 4.38) | 2.64 (2.22 – 3.15) | 6.69 (5.62 – 7.97) |

* Adjusted for all baseline characteristics listed in Table 1.

# **Figure E1. Flow diagram of COPD patients included in the study population.**

COPD patients aged over 40 years old with CPRD Aurum data between 2004 and 2019
**N=431,917**

COPD patients with HES linkage

**N=355,696**

COPD patients with current or ex-smoking status

**N=340,515**

Legend: CPRD (Clinical Practice Research Datalink); HES (Hospital Episode Statistics)

# Figure E2. Exacerbation frequency and severity in patients with active follow-up for each calendar year of follow-up.

**Legend:** AECOPD (acute exacerbations of COPD).
